# Supplementary material
Source: PubMed Central journal article supplement (PMC4663146)

Supplemental Figure 2. Bland-Altman plots of 9 androgens measured across two laboratories.

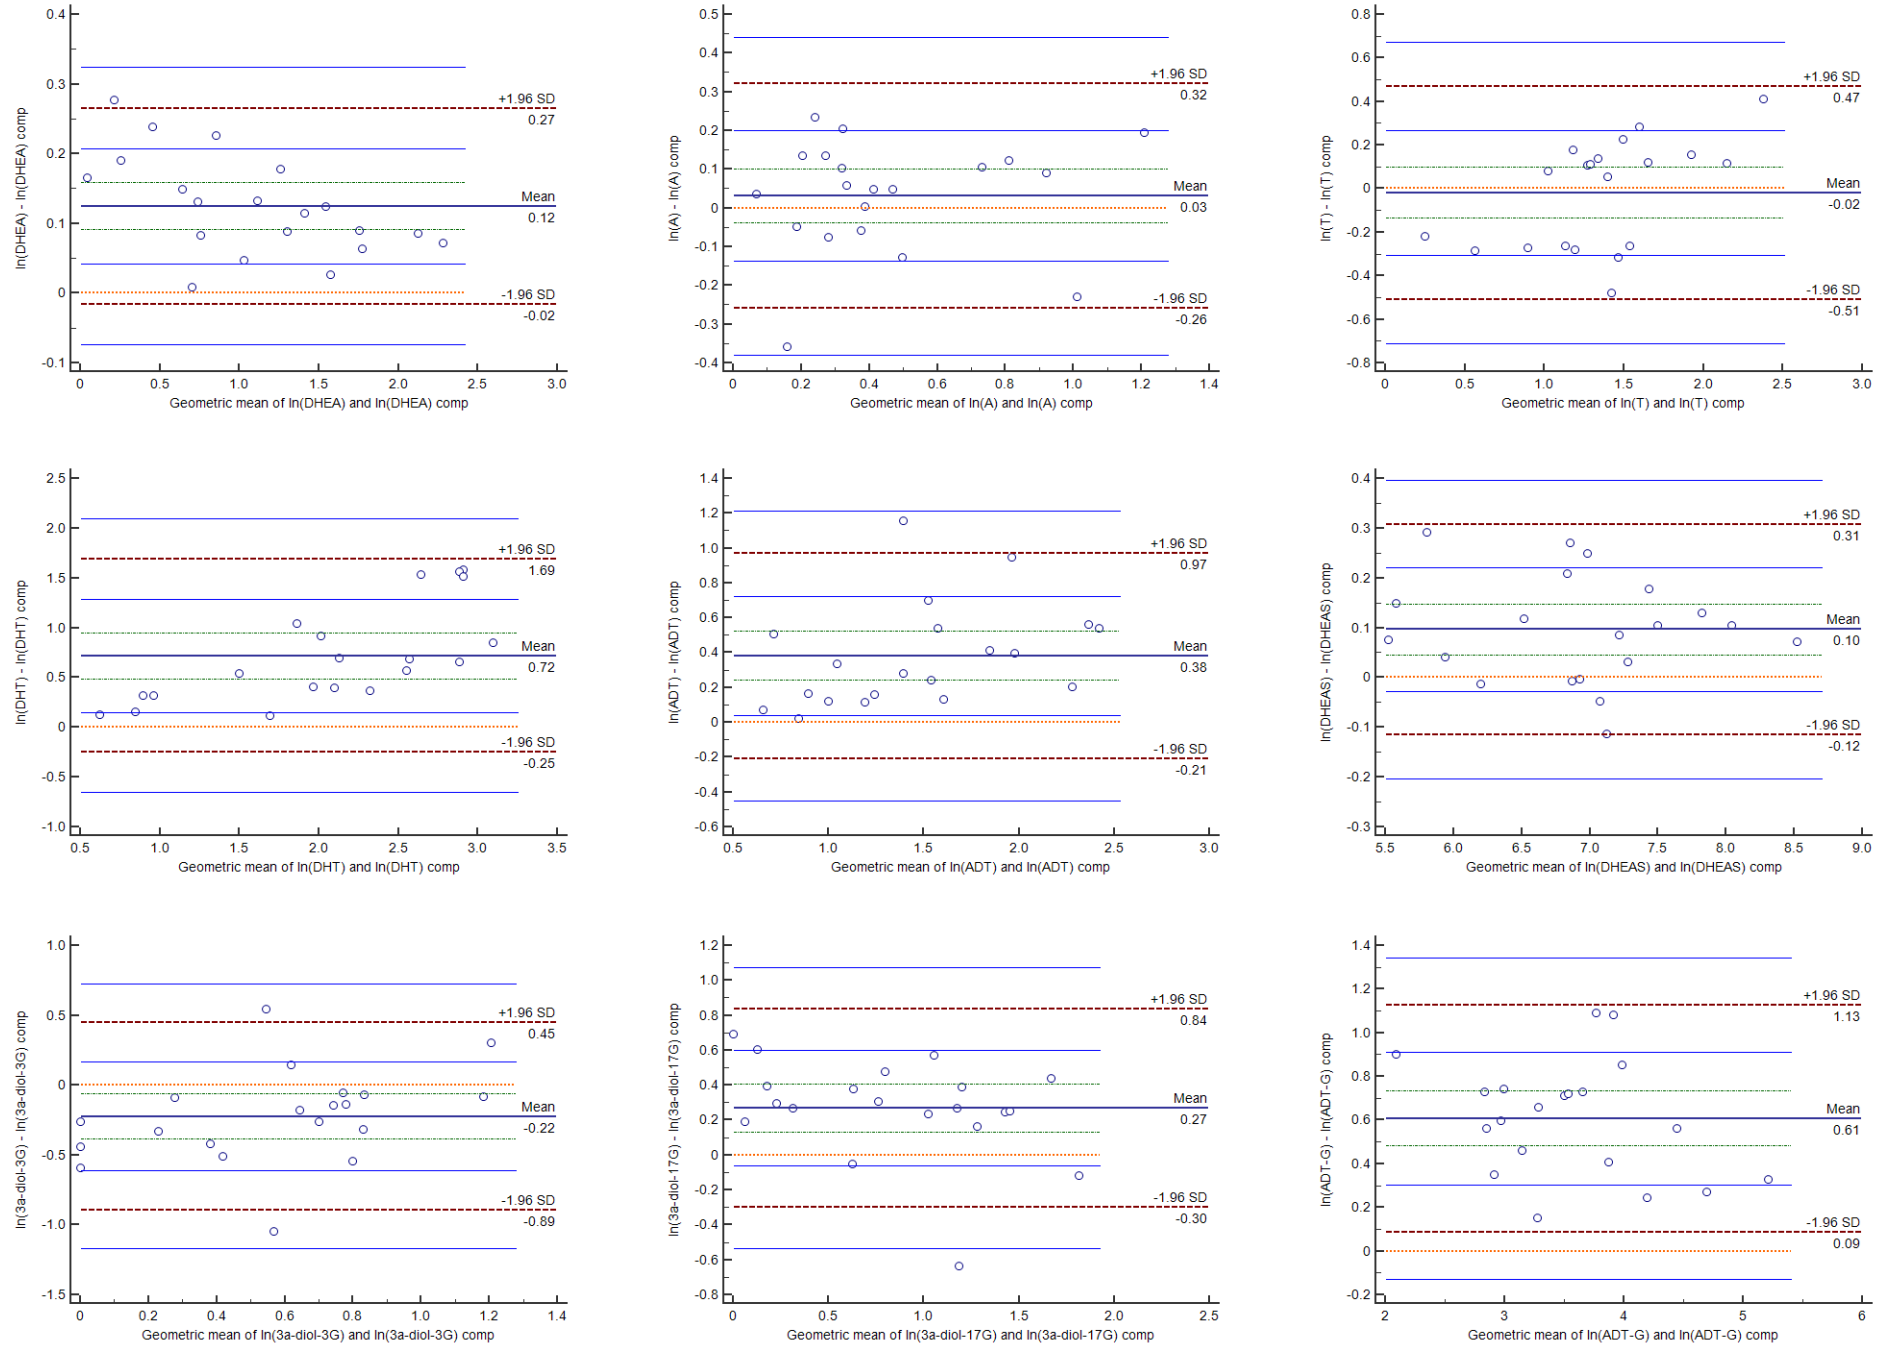

Supplement: NIHMS729440-supplement-3.pdf [file NIHMS729440-supplement-3.pdf]
